# Supplementary material for: DFT coupled with NEGF study of the electronic properties and ballistic transport performances of 2D SbSiTe3
Source: Royal Society of Chemistry journal article supplement (doi:10.1039/d0nr01838d), 2020-01-01
Supplement: d0nr01838d1.pdf [file d0nr01838d1.pdf]

## Supplementary Information

### **A DFT-NEGF study on the electronic and transport properties of 2D SbSiTe<sub>3</sub>**

Xuemin Hu<sup>a</sup>, Hengze Qu<sup>b</sup>, Lili Xu<sup>b</sup>, Wenqiang Liu<sup>b</sup>, Tingting Guo<sup>b</sup>, Bo Cai<sup>b</sup>, Xuechao Yu<sup>b</sup>, Junwu Zhu<sup>\*a</sup>, Shengli Zhang<sup>\*b</sup>

<sup>a</sup>Key Laboratory for Soft Chemistry and Functional Materials, Ministry of Education, Nanjing University of Science and Technology, Nanjing 210094, China.

E-mail: [zhujw@njust.edu.cn](mailto:zhujw@njust.edu.cn)

<sup>b</sup>MIIT Key Laboratory of Advanced Display Materials and Devices, School of Materials Science and Engineering, Nanjing University of Science and Technology, Nanjing 210094, China.

E-mail: [zhangslvip@njust.edu.cn](mailto:zhangslvip@njust.edu.cn)

**Table S1.** The optimized lattice parameters, layered thickness (L), and interlayer distance ( $d_0$ ) for few-layer SbSiTe<sub>3</sub>.

| Type       | Lattice parameters (Å) | L (Å) | $d_0$ (Å) |
|------------|------------------------|-------|-----------|
| Bulk       | a=b=7.147              | 3.953 | 3.161     |
| Five-layer | a=b=7.141              | 3.956 | 3.168     |
| Four-layer | a=b=7.139              | 3.958 | 3.169     |
| Trilayer   | a=b=7.138              | 3.959 | 3.175     |
| Bilayer    | a=b=7.133              | 3.963 | 3.175     |
| Monolayer  | a=b=7.127              | 3.973 | /         |

**Table S2.** The binding energy of few-layer and bulk SbSiTe<sub>3</sub>.

| Type       | Binding Energy (eV/atom) |
|------------|--------------------------|
| Bulk       | 4.210                    |
| Five-layer | 4.191                    |
| Four-layer | 4.186                    |
| Trilayer   | 4.178                    |
| Bilayer    | 4.162                    |
| Monolayer  | 4.118                    |

**Table S3.** The off-current ( $I_{\text{off}}$ ) and the on-current ( $I_{\text{on}}$ ) of 2D SbSiTe<sub>3</sub> MOSFET with the channel length is 10 nm and 5nm.

| Type | Channel length (nm) | $V_{\text{dd}}$ | $I_{\text{off}}$ ( $\mu\text{A}/\mu\text{m}$ ) | $I_{\text{on}}$ ( $\mu\text{A}/\mu\text{m}$ ) |
|------|---------------------|-----------------|------------------------------------------------|-----------------------------------------------|
|      | 10                  | 0.72            | 0.1                                            | 210                                           |
|      |                     | 0.72            | $2 \times 10^{-5}$                             | 30                                            |

|        |    |      |                    |     |
|--------|----|------|--------------------|-----|
| n-type | 5  | 0.64 | 0.1                | 51  |
|        |    | 0.64 | $5 \times 10^{-5}$ | \   |
| p-type | 10 | 0.72 | 0.1                | 350 |
|        |    | 0.72 | $2 \times 10^{-5}$ | 32  |
|        | 5  | 0.64 | 0.1                | 223 |
|        |    | 0.64 | $5 \times 10^{-5}$ | \   |

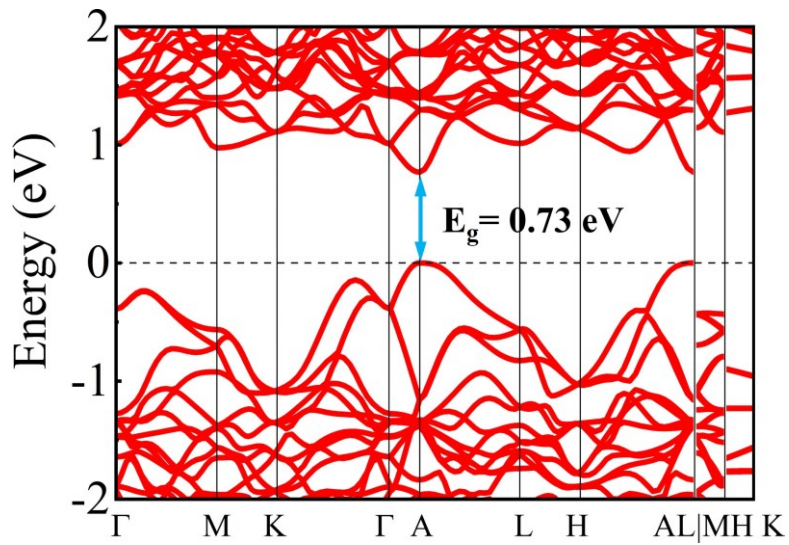

**Fig. S1.** The band structure of bulk SbSiTe<sub>3</sub> at HSE06 level.

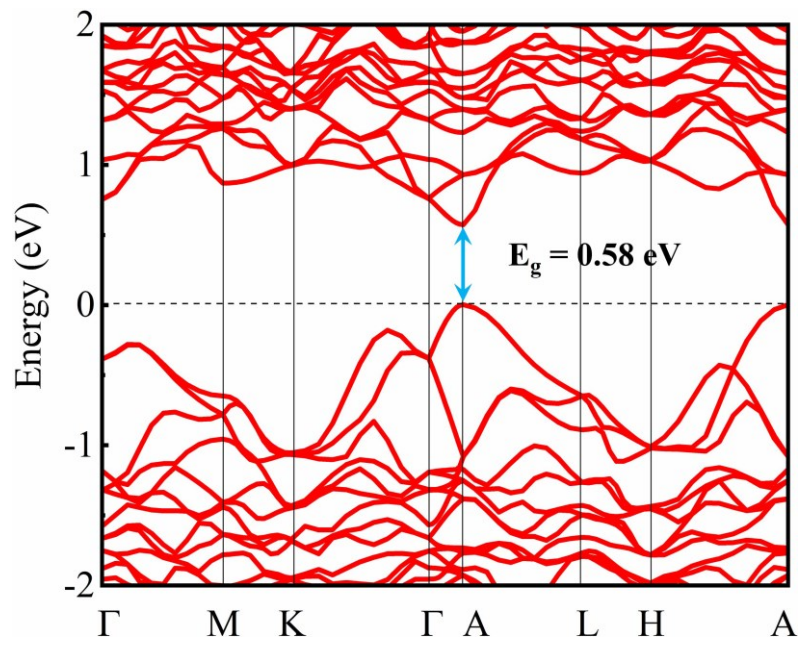

**Fig. S2.** The band structure of bulk SbSiTe<sub>3</sub> at HSE06+soc level.

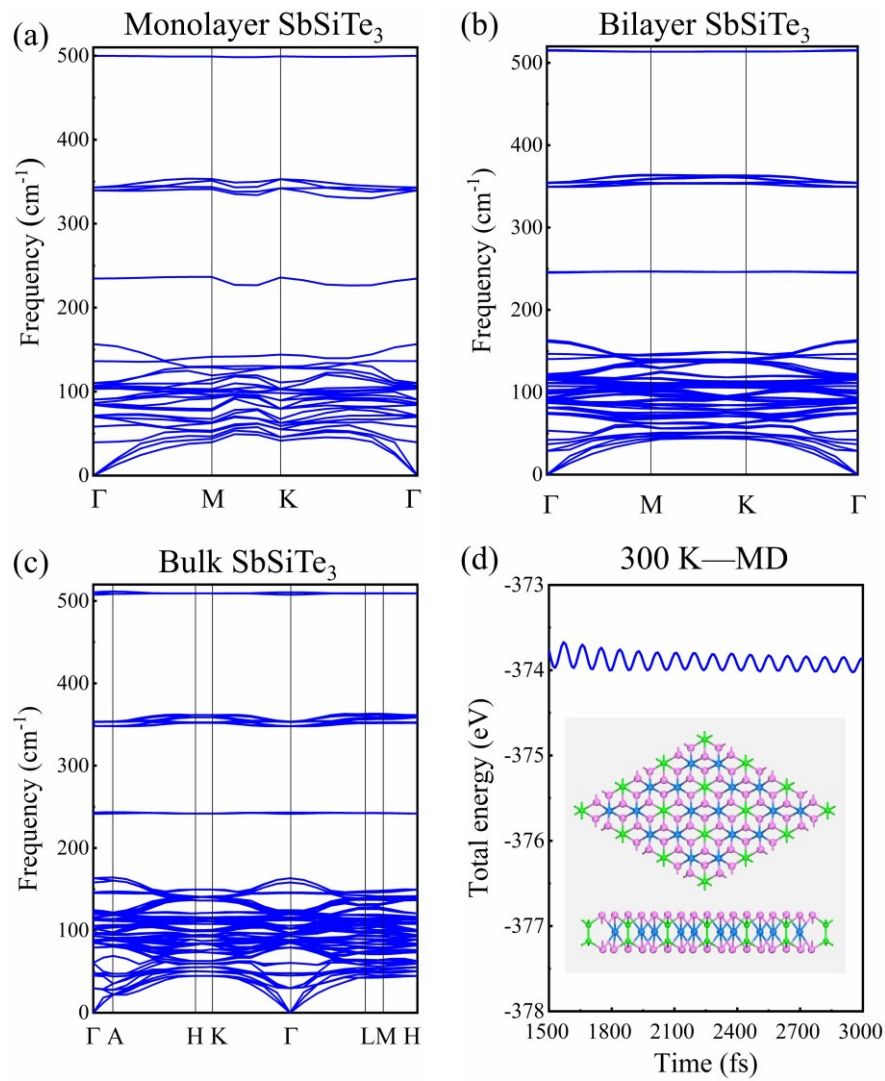

**Fig. S3.** The phonon spectrums of (a) monolayer, (b) bilayer and (c) bulk SbSiTe<sub>3</sub>. (d) The total energy variation versus time at T = 300 K, and insert is the top and side views of a snapshot of monolayer SbSiTe<sub>3</sub> after 3 ps in the MD simulation.

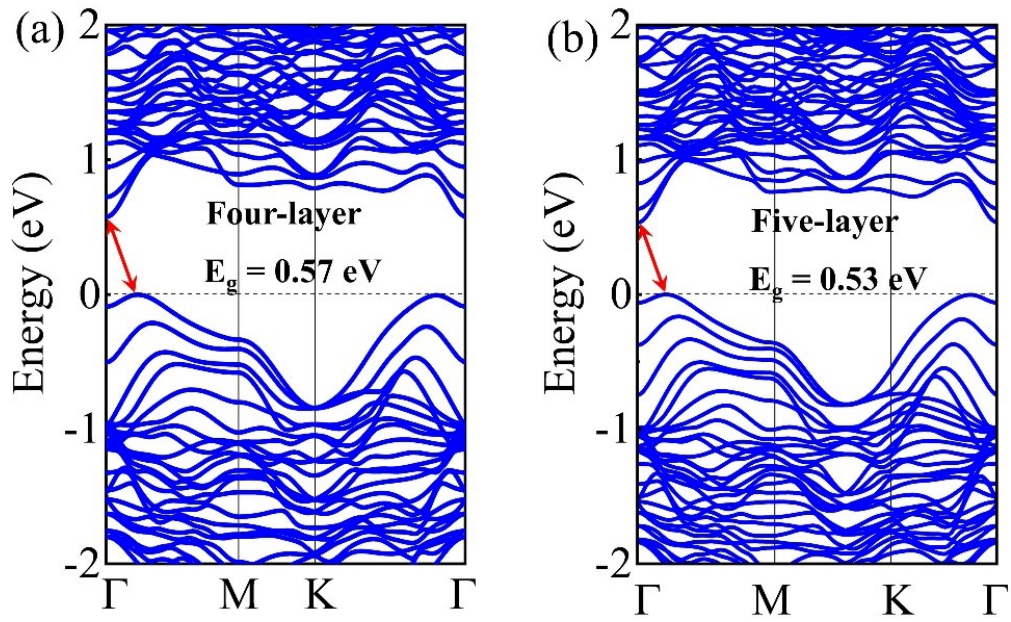

**Fig. S4.** The band structures of (a) four-layer and (b) five-layer SbSiTe<sub>3</sub> at PBE level.

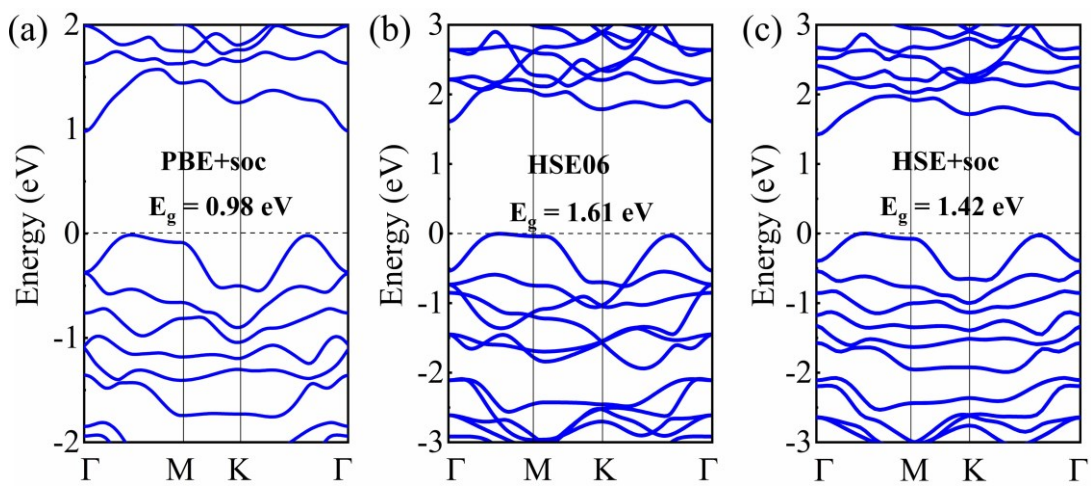

**Fig. S5.** The band structure of monolayer SbSiTe<sub>3</sub> at (a) PBE + soc, (b) HSE06 and (c) HSE + soc level.

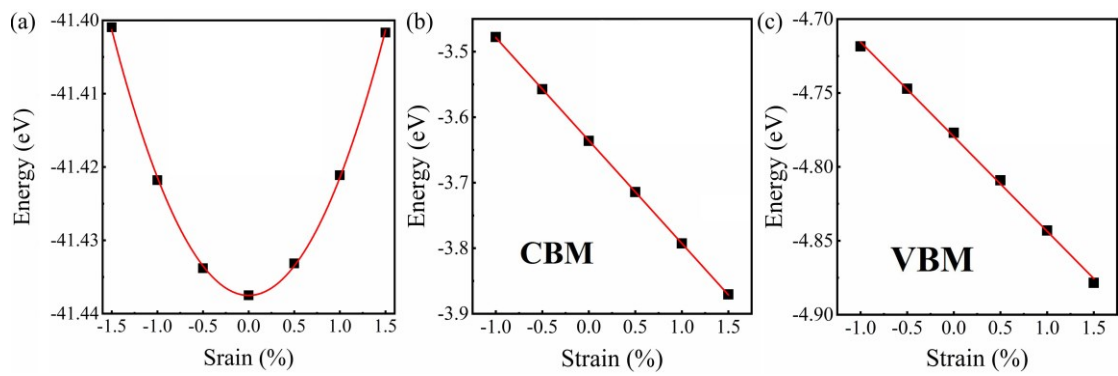

**Fig. S6.** (a) The energy-strain relation and the energy shifts versus strain with respect to the vacuum energy of (b) CBM and (c) VBM for monolayer SbSiTe<sub>3</sub>.
